# Supplementary material for: A novel long intergenic non-coding RNA, Nostrill, regulates iNOS gene transcription and neurotoxicity in microglia
Source: J Neuroinflammation. 2021 Jan 6;18:16. doi: 10.1186/s12974-020-02051-5 (PMC7789650; doi:10.1186/s12974-020-02051-5)
Supplement: Supplementary file 2 — Additional file 2: Supplementary Table 1. Primers for RT-PCR. [file 12974_2020_2051_MOESM2_ESM.xlsx]

## Sheet: Sheet1
		Sense Primer (5'-3')	Antisense Primer (5'-3')
	Primers for RT-PCR
	Actin	TGGTGGGAATGGGTCAGAA	TCTCCATGTCGTCCCAGTTG
	AK15331	GCAGGTGGAGATGAGAGG	GGCAAATGACCAGAAGATT
	Arg1	QIAGEN PPM31770C
	Ccl2	CACCAGCAAGATGATCCCAAT	CATTTGGTTCCGATCCAGGT
	Firre	TAGGATGCCAACCACGCC	CCCATCGCCAATTTAACCC
	Gapdh	AGTTGGGATAGGGCCTCTCTT	AACAGGGTGGTGGACCTCAT
	Genomic Actin	TCACTCAGAACGGACACCA	AGGCGTAAAGTTGGCTGTG
	GM14005	CAAGCTGCGCATATCTTGGG	AACTGTGTCATGGGGCTTCC
	GM19510	CCACGAGCCAAGATAAACC	TTGAGAACCAGAAACCGAG
	IL-1β	TTTGAAGAAGAGCCCATCCT	TCATCTCGGAGCCTGTAGTG
	IL-6	CCCAATTTCCAATGCTCTCCT	CATAACGCACTAGGTTTGCCG
	iNOS	AGACGGATAGGCAGAGATTGG	ACTGACACTTCGCACAAAGC
	lincRNA-Cox2	AGTATGGGATAACCAGCTGAGG	GAATGCTGAGAGTGGGAGAAATA
	lincRNA-Tnfaip3	GGCTCAGTTGCCATAGAGACTC	CCCACAGCCTACCAAACATC
	Mirg	ATCATCGCCATTGTGTGC	TGTCCAGCAGAGGTGTTGAG
	Nespas	ACCTTCAAACCACTGCGA	TTGTTCCGAGTCCAACAGC
	Nostrill	ATCTGTCTCTGCCTCCTACG	TGAAAGGTCCAAGAAGCC
	NR_029444	CATAATCGCATACTGTAGC	AATAATAGAAGCCCAGC
	TNF-α	CCACGCTCTTCTGTCTACTG	GGTTTGTGAGTGTGAGGGTC
	Primers for Nostrill overexpression
	NR_126553	GCGGGACCAGCGGGACAAACTACTCATC	TATATGTAGGAGATTTATTAGAACGACTTATAGGC
	Primers for ChIP and ChIRP
	iNOS1	TTGCTAAGCCAAGTAGGTGGTG	AGAGGCACACACACAAGTTCAG
	iNOS2	ACACCTCTTTCCCTCCAACTTG	TGCCCTCCTTCTTGTCTCAG
	iNOS3	ATTTCCCTGTCCTGGTGTTG	GCAGAGGTTTGGAGGCTAAG
	iNOS4	TAAATACCTGATGGCTGCTG	GGTGGCTGAGAAGTTTCAA
	iNOS5	CTGAGAGAGGCAAGCCAT	TCCTGGTGACTAAATGAGGTG
	iNOS6	CTTTAGTGGAATCAGGAGCCTC	TGGGACTTGGAGTGGGATAG
	iNOS7	ACTCACCTGCTCTTCTAACTGG	GCCCAAACCAAACCACA
	Probes for ChIRP
	Nostrill 1	CATGCTGGGATGAGTAGTTT-BIOTEG
	Nostrill 2	TGCTCGCAGGAGAGAATAGA-BIOTEG
	Nostrill 3	ATTCCATTAATGCTTCTTCC-BIOTEG
	Nostrill 4	GGGTGTCAGAGATCTCAGAA-BIOTEG
	Nostrill 5	ATTTTCTACACATTGGTCCA-BIOTEG
	Nostrill 6	TAGGAGGCAGAGACAGATCT-BIOTEG
	Nostrill 7	CCCACATGGTTTTCAGTATA-BIOTEG
	Nostrill 8	AACGACTTATAGGCTGTGGT-BIOTEG
	LacZ 1	TTCAGACGGCAAACGACTGT-BIOTEG
	LacZ 2	TGATGCTCGTGACGGTTAAC-BIOTEG
	LacZ 3	TCAGTTGCTGTTGACTGTAG-BIOTEG
	LacZ 4	CCAGTGAATCCGTAATCATG-BIOTEG
	LacZ 5	AATGTGAGCGAGTAACAACC-BIOTEG
	LacZ 6	GTAGCCAGCTTTCATCAACA-BIOTEG
